# Supplementary material for: Stability of Non-Ionic Surfactant Vesicles Loaded with Rifamycin S
Source: MDPI journal article supplement (doi:10.3390/pharmaceutics14122626), 2022-11-28
Supplement: s1 [file s1]

# Stability of non-ionic surfactant vesicles loaded with Rifamycin S

V. Marchianò <sup>1,2</sup>, M. Matos<sup>1</sup>, I. Marcet<sup>1</sup>, M.P. Cabal <sup>3</sup>, G. Gutiérrez<sup>1</sup>, M.C. Blanco-López<sup>2\*</sup>

<sup>1</sup> Department of Chemical and Environmental Engineering, University of Oviedo, Julián Clavería 8, 33006 Oviedo, Spain.

<sup>2</sup> Department of Physical and Analytical Chemistry, University of Oviedo, Julián Clavería 8, 33006 Oviedo, Spain

<sup>3</sup> Department of Organic and Inorganic Chemistry, Instituto de Química Organometálica “Enrique Moles”, Universidad de Oviedo c/ Julián Clavería 8, 33006 Oviedo, Spain

\* Correspondence: cblanco@uniovi.es; gutierrezgemma@uniovi.es

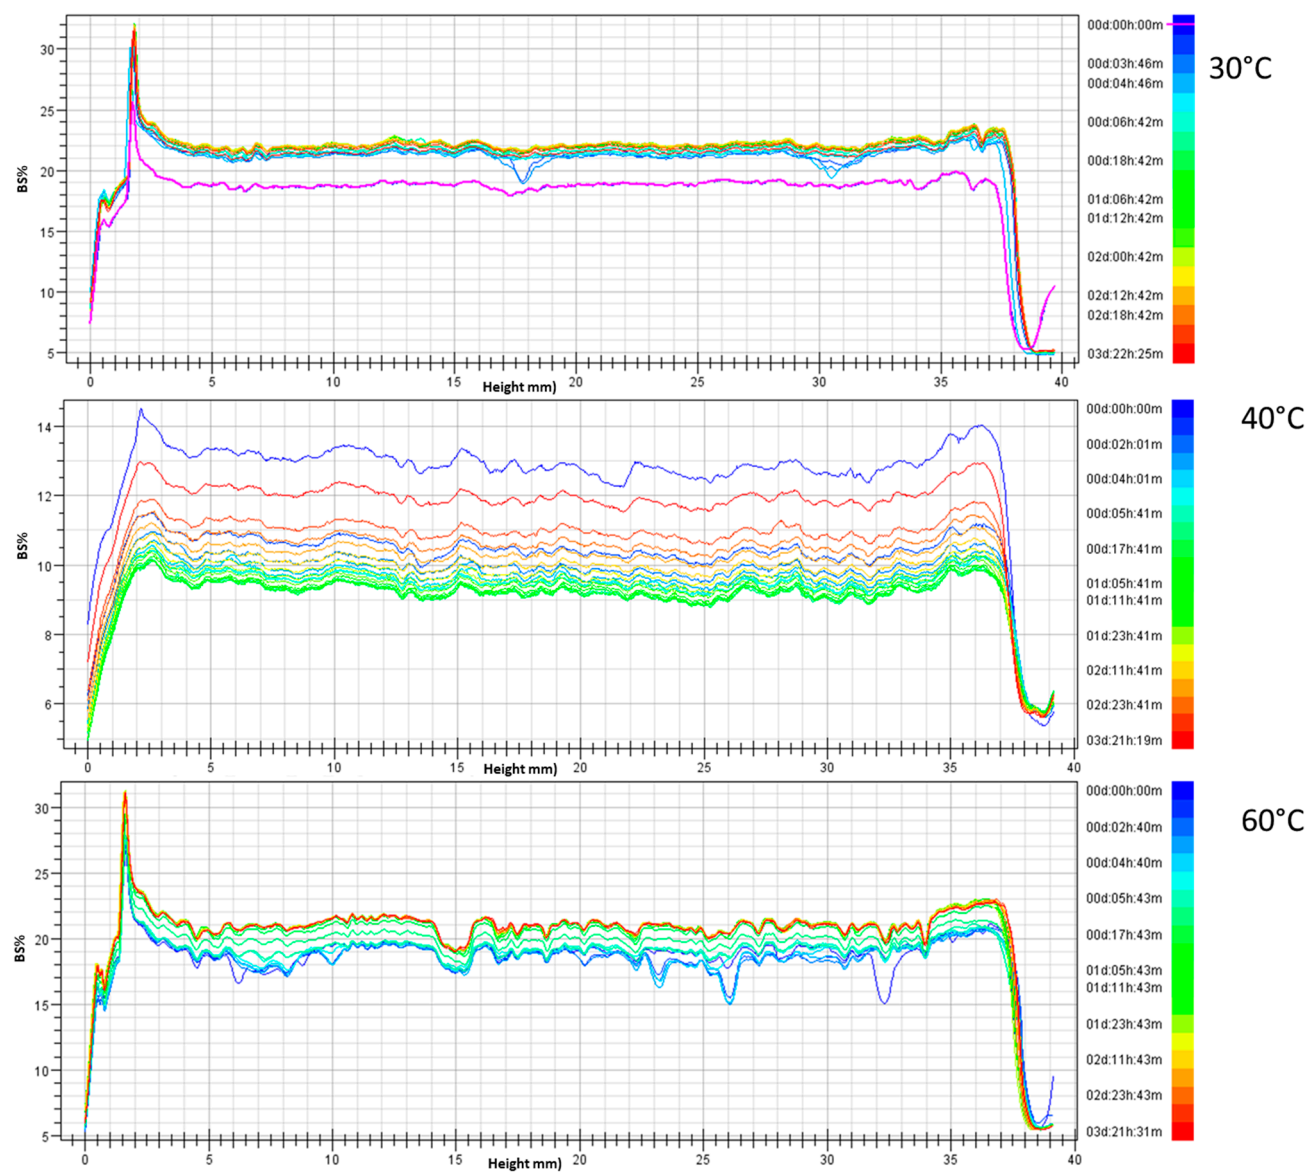

Figure S1. Graph of stability analysis for 3 days obtained from Turbiscan Lab Expert (Formulaction Co., France) of niosomes with Rifamycin S in MilliQ water at 3 temperatures: 30°C, 40°C and 60°C

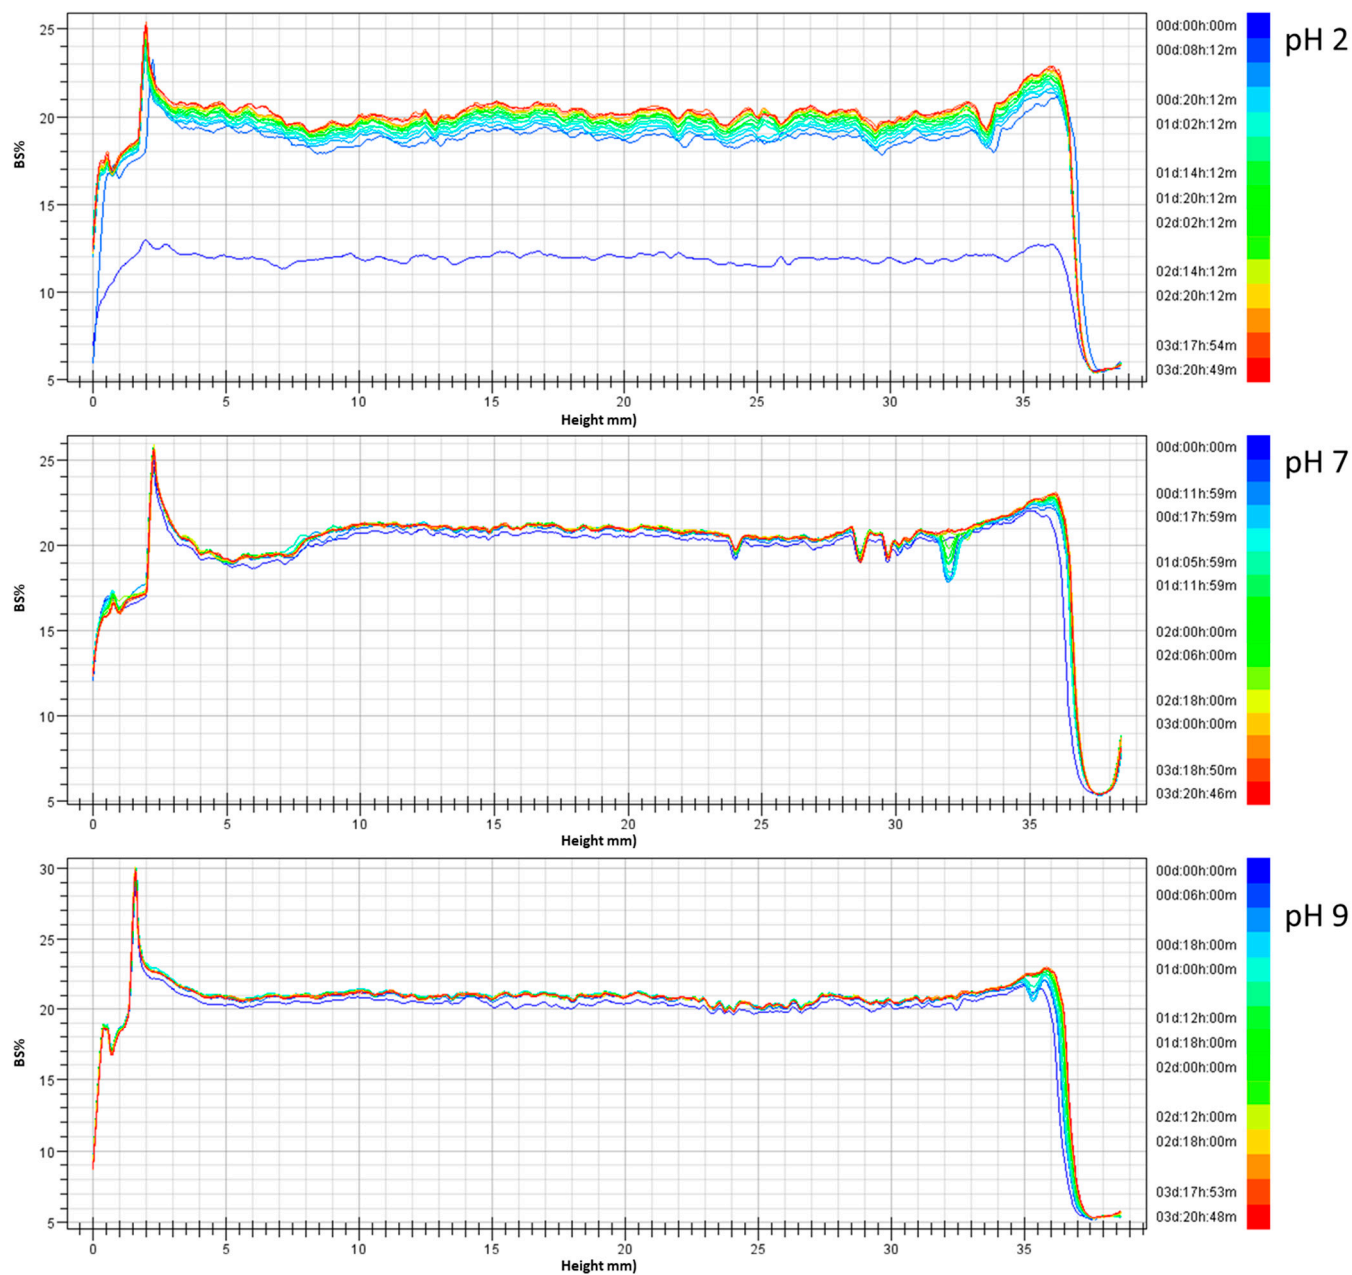

Figure S2. Graph of stability analysis for 3 days obtained from Turbiscan Lab Expert (Formulaction Co., France) of niosomes with Rifamicyn S in MilliQ water at 3 pH: 2, 7 and 9

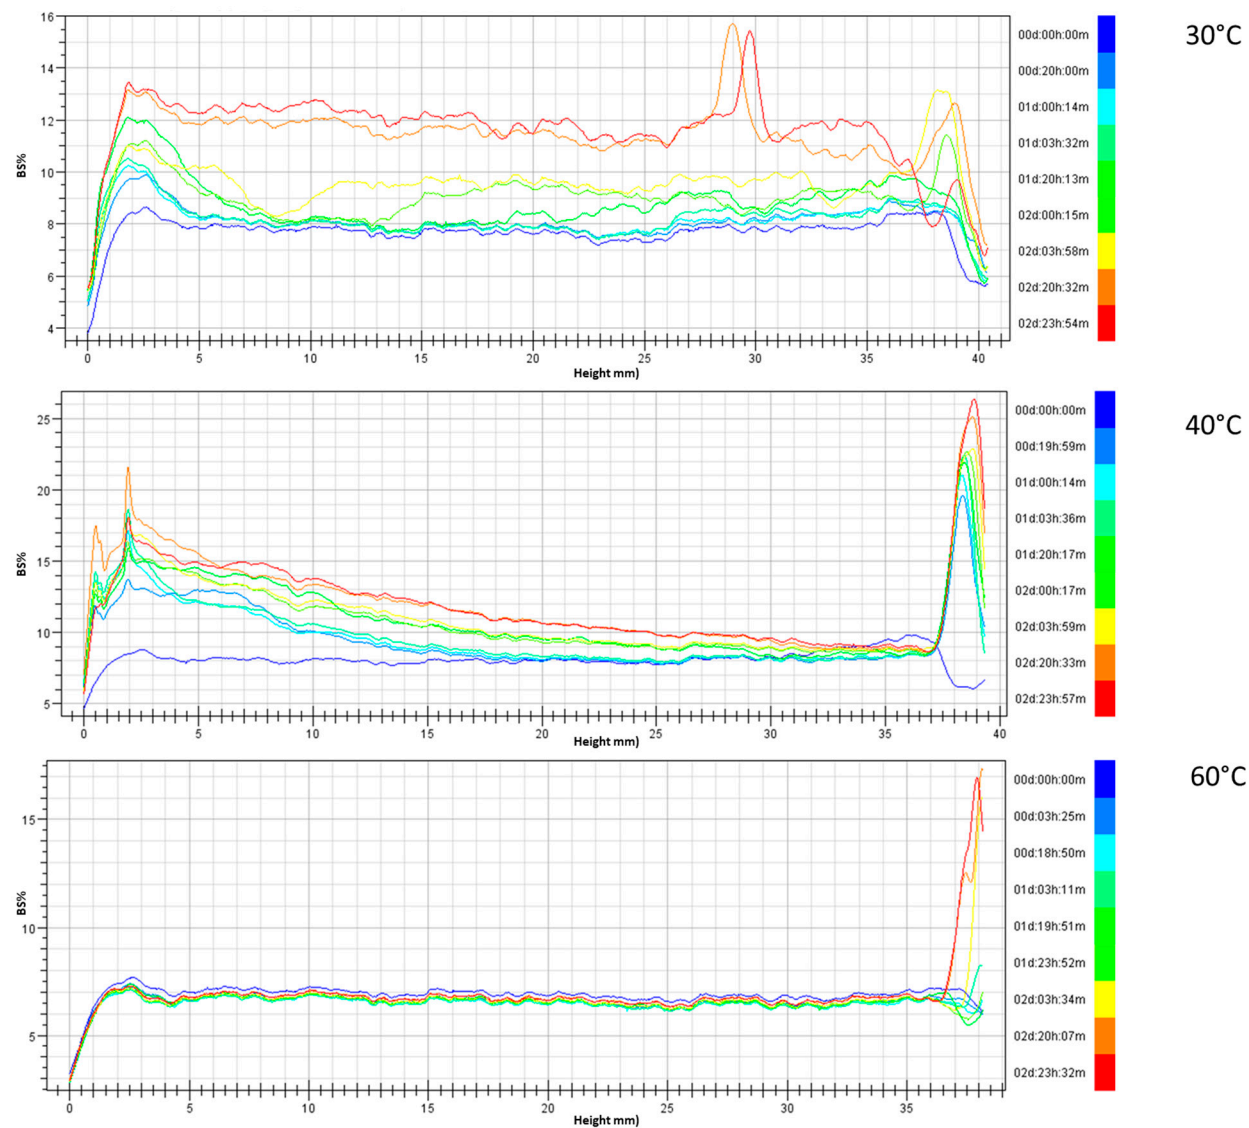

Figure S3. Graph of stability analysis for 3 days obtained from Turbiscan Lab Expert (Formulaction Co., France) of niosomes with Rifamicyn S in MilliQ water and glycerol (60:40) at 3 temperatures: 30°C, 40°C and 60°C

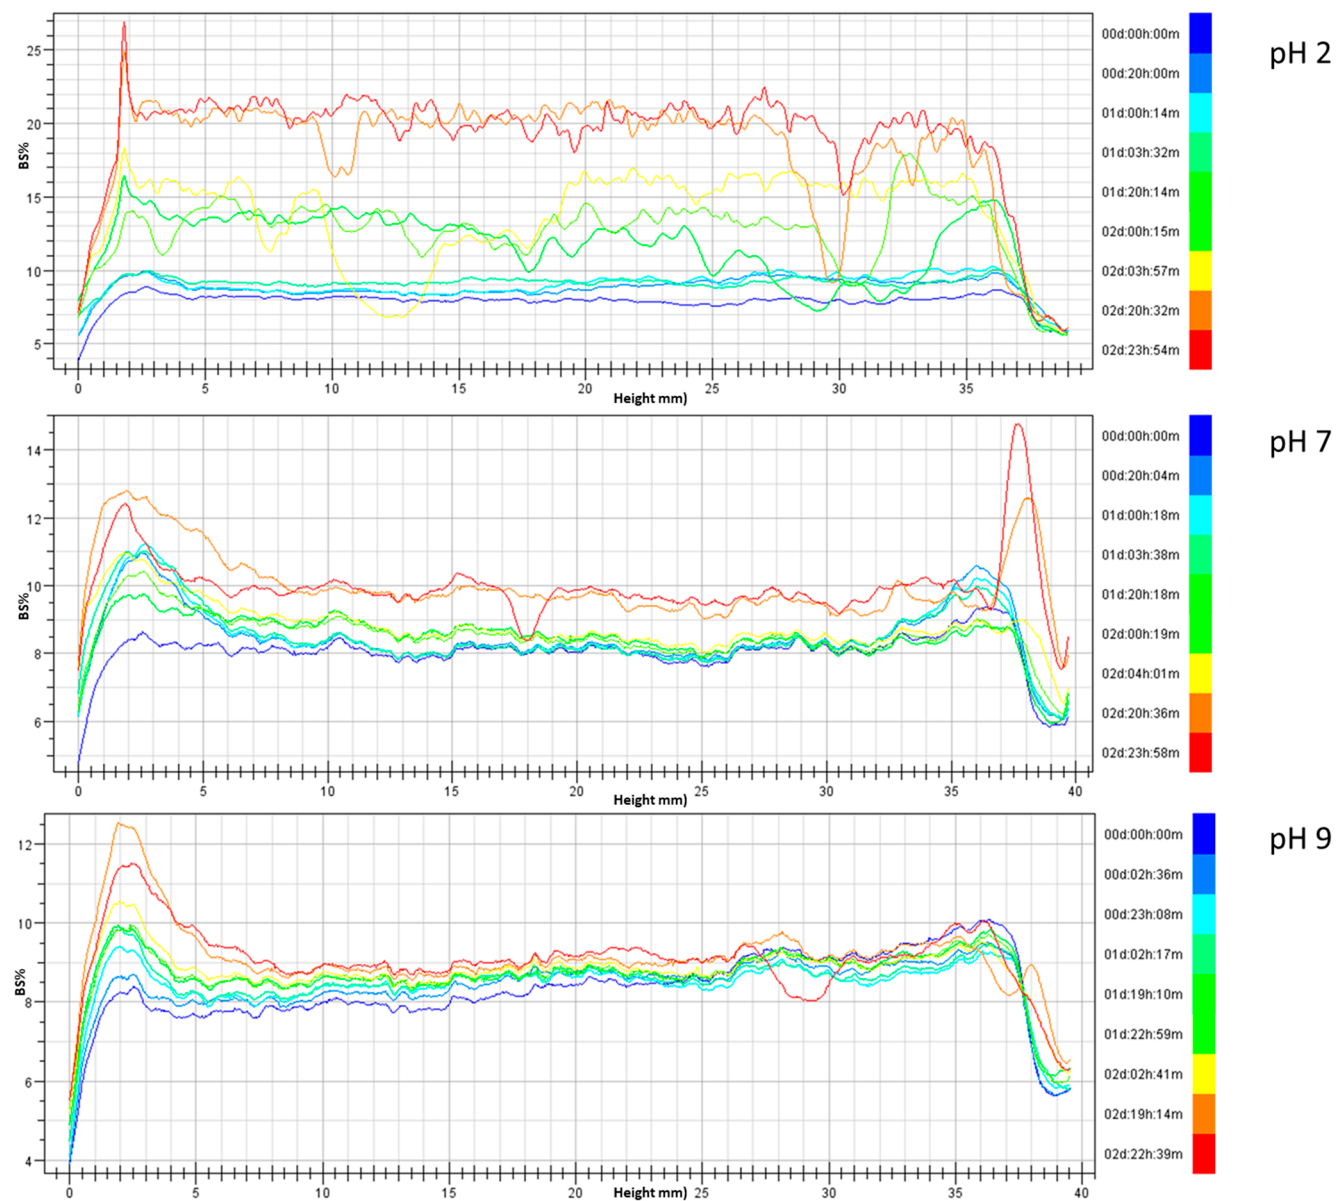

Figure S4. Graph of stability analysis for 3 days obtained from Turbiscan Lab Expert (Formulation Co., France) of niosomes with Rifamicyn S in MilliQ water and glycerol (60:40) at 3 pH: 2, 7 and 9

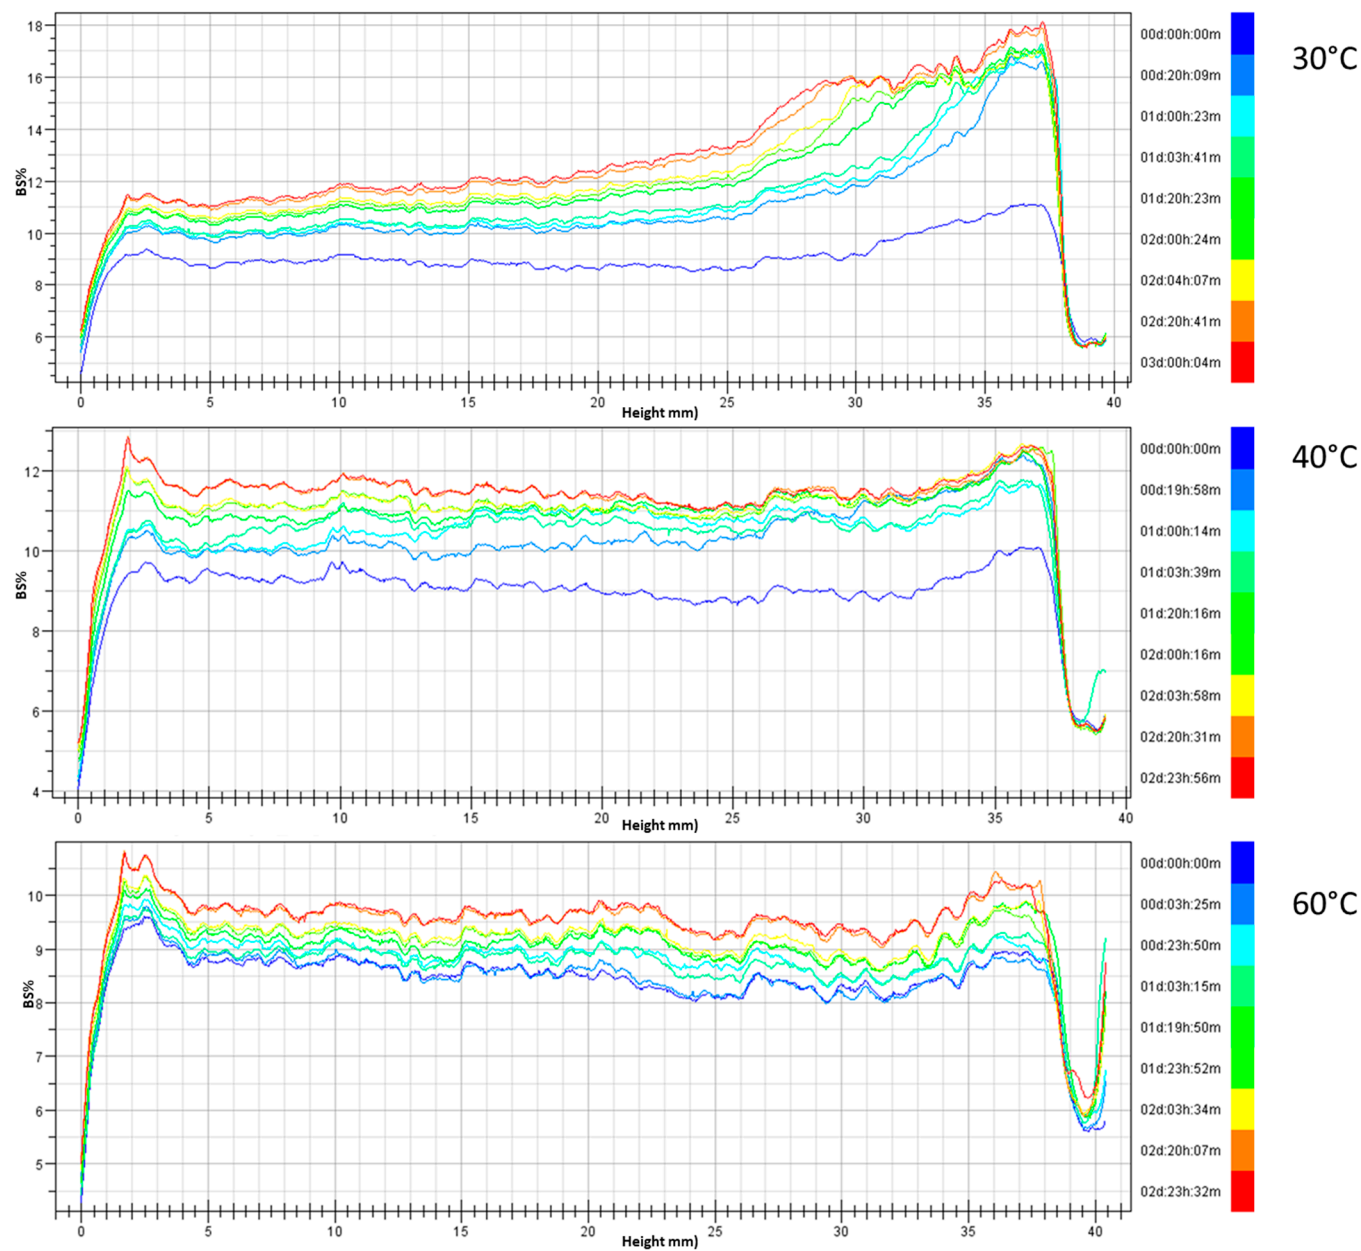

Figure S5. Graph of stability analysis for 3 days obtained from Turbiscan Lab Expert (Formulation Co., France) of niosomes with Rifamicyn S in MilliQ water and PEG400 (55,7:44,3) at 3 temperatures: 30°C, 40°C and 60°C



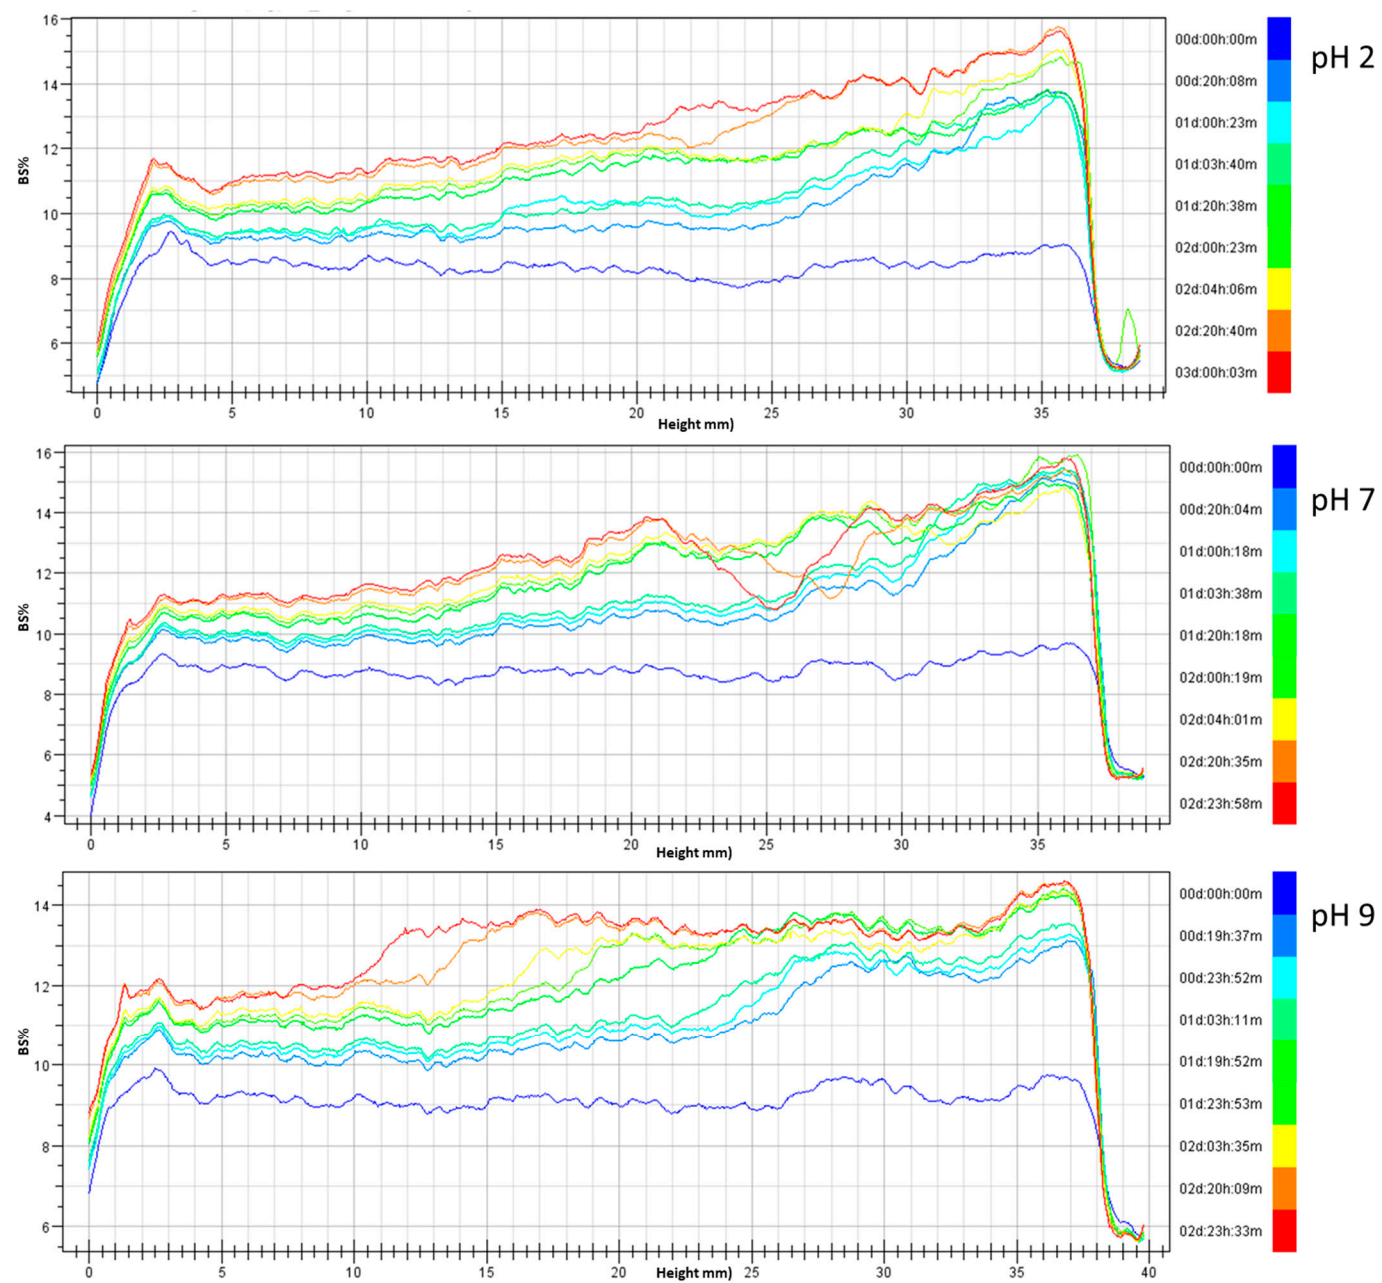

Figure S6. Graph of stability analysis for 3 days obtained from Turbiscan Lab Expert (Formulacion Co., France) of niosomes with Rifamicyn S in MilliQ water and PEG 400 (55,7:44,3) at 3 pH: 2, 7 and 9

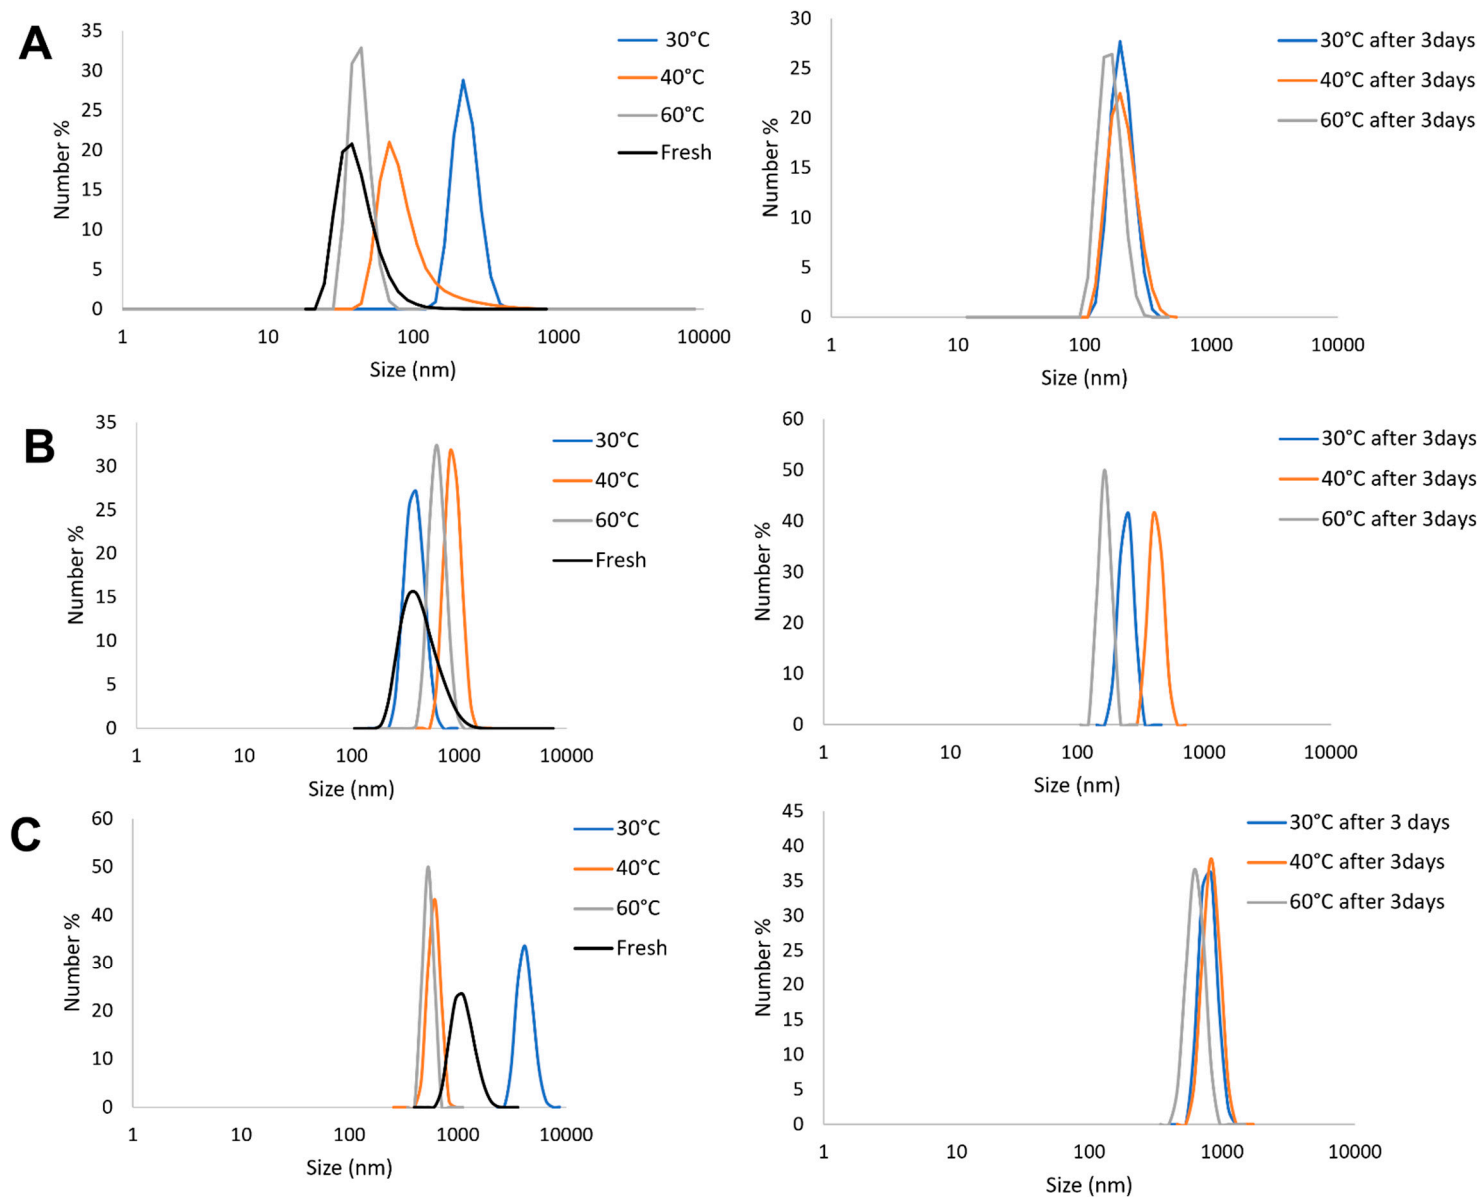

Figure S7. Size distribution curves of niosomes at 30°C, 40°C and 60°C fresh and after 3 days of storage. A) Niosomes with Rifamycin S encapsulated hydrated with pure MilliQ; B) Niosomes with Rifamycin S encapsulated hydrated with glycerol solution (60:40 v/v); C) Niosomes with Rifamycin S encapsulated hydrated with PEG 400 solution (44.7:55.3 v/v).



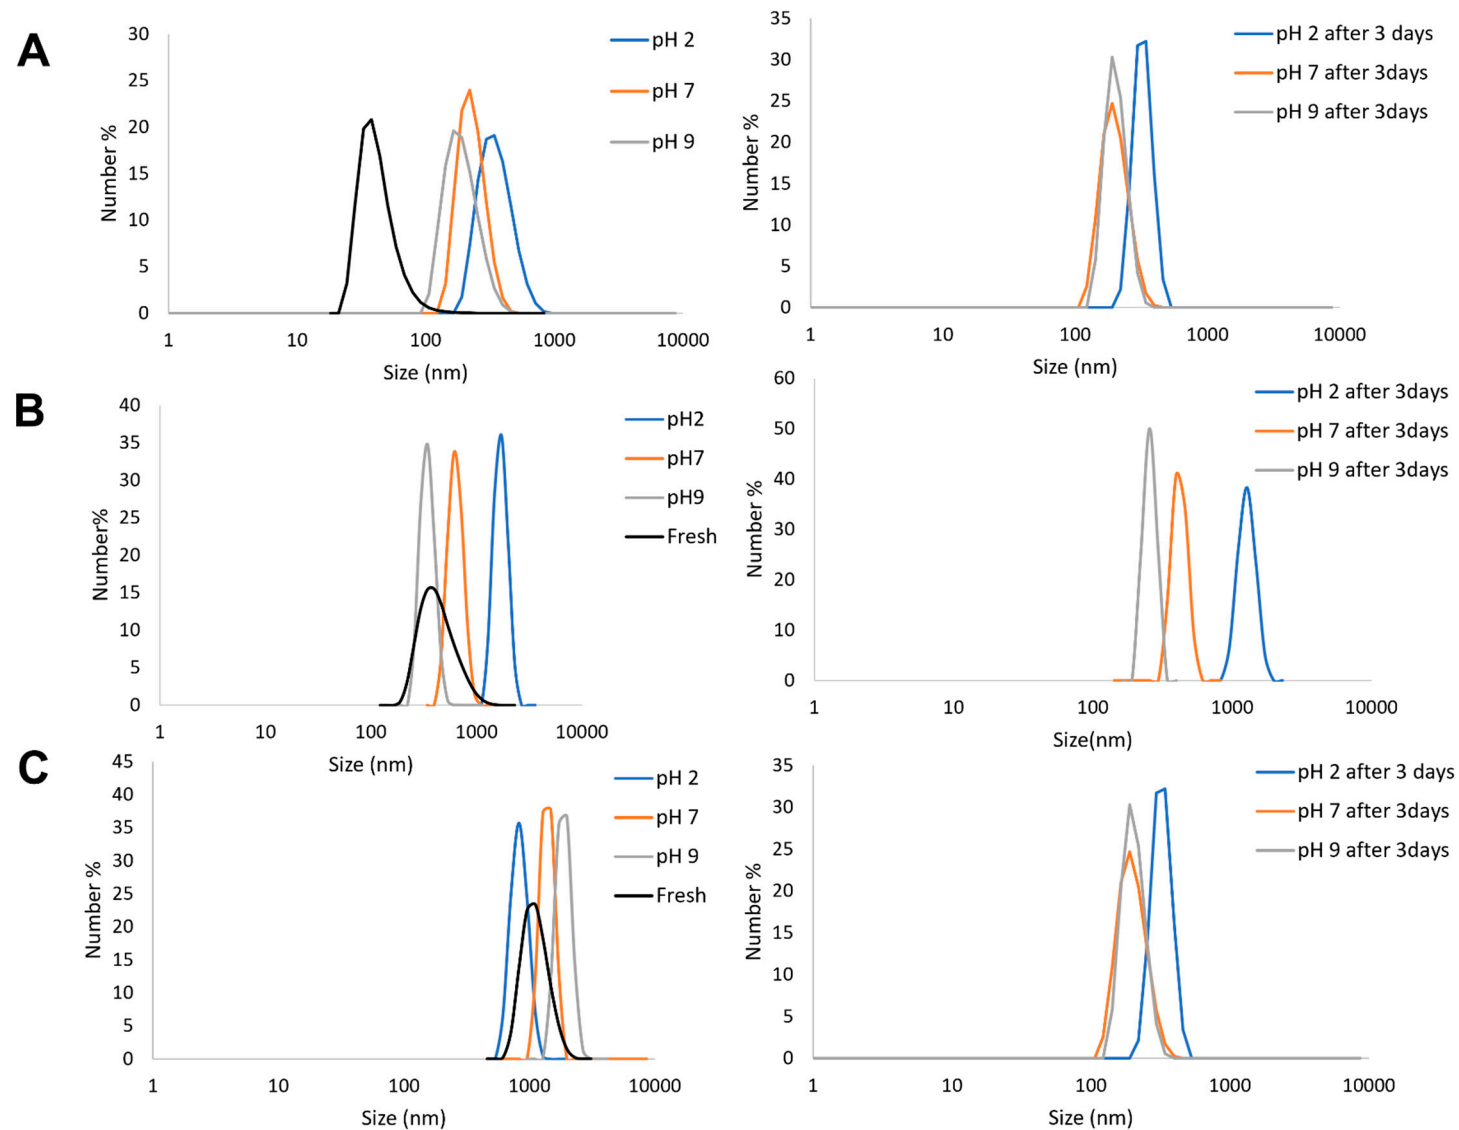

Figure S8. Distribution curves of niosomes at pH 2, 7 and 9 in day 0 and day 3. A) Niosomes with rifamycin encapsulated in milliQ water as aqueous phase; B) Niosomes with ri-famycin encapsulated in mixture of milliQ water and glycerol (60:40 v/v); C) Niosomes with rifamycin encapsulated in mixture of milliQ water and PEG 400 (44.7:55.3 v/v).
